# Supplementary material
Source: PubMed Central journal article supplement (PMC5951183)
Supplement: NIHMS956908-supplement-Table_S1.pdf [file NIHMS956908-supplement-Table_S1.pdf]

| GA(weeks) | PIGF  |       |       |        |        | GA(weeks) | sVEGFR1 |        |        |        |         |
|-----------|-------|-------|-------|--------|--------|-----------|---------|--------|--------|--------|---------|
|           | 2.5th | 10th  | 50th  | 0.90th | 97.5th |           | 2.5th   | 10th   | 50th   | 0.90th | 97.5th  |
| 12        | 17.3  | 25.3  | 45.4  | 88.4   | 132.4  | 12        | 384.8   | 513.9  | 970.8  | 1650.2 | 2364.6  |
| 13        | 21.5  | 32.3  | 58.0  | 117.8  | 180.2  | 13        | 376.2   | 516.6  | 962.1  | 1695.5 | 2501.5  |
| 14        | 26.6  | 40.8  | 73.3  | 154.1  | 238.9  | 14        | 363.8   | 511.9  | 951.9  | 1733.5 | 2613.8  |
| 15        | 32.8  | 50.9  | 91.6  | 198.0  | 309.5  | 15        | 349.6   | 502.0  | 940.1  | 1761.7 | 2696.7  |
| 16        | 40.3  | 62.8  | 113.5 | 250.3  | 392.9  | 16        | 335.2   | 488.9  | 926.8  | 1778.5 | 2748.6  |
| 17        | 49.3  | 76.7  | 139.4 | 311.6  | 490.0  | 17        | 321.7   | 474.4  | 912.6  | 1783.9 | 2770.6  |
| 18        | 59.8  | 92.8  | 169.8 | 382.4  | 601.8  | 18        | 309.9   | 460.1  | 898.2  | 1779.2 | 2766.8  |
| 19        | 71.9  | 110.8 | 205.0 | 463.1  | 728.6  | 19        | 300.5   | 446.9  | 884.3  | 1766.5 | 2743.0  |
| 20        | 85.4  | 130.8 | 245.2 | 553.7  | 871.0  | 20        | 293.6   | 436.0  | 872.1  | 1748.8 | 2706.7  |
| 21        | 100.0 | 152.4 | 290.2 | 654.0  | 1028.5 | 21        | 289.5   | 427.8  | 862.3  | 1729.5 | 2665.5  |
| 22        | 115.2 | 174.9 | 339.8 | 763.3  | 1200.5 | 22        | 288.3   | 423.0  | 856.2  | 1712.4 | 2627.5  |
| 23        | 130.4 | 197.6 | 392.9 | 880.5  | 1385.0 | 23        | 290.2   | 422.0  | 854.7  | 1701.2 | 2600.3  |
| 24        | 144.7 | 219.6 | 448.2 | 1004.0 | 1579.4 | 24        | 295.2   | 425.2  | 859.0  | 1699.7 | 2591.1  |
| 25        | 157.2 | 239.6 | 503.7 | 1131.4 | 1779.6 | 25        | 303.5   | 433.1  | 870.2  | 1711.7 | 2607.2  |
| 26        | 167.0 | 256.4 | 556.8 | 1259.6 | 1980.3 | 26        | 315.1   | 446.0  | 889.7  | 1741.3 | 2655.8  |
| 27        | 173.4 | 268.9 | 604.7 | 1384.7 | 2174.8 | 27        | 330.2   | 464.6  | 918.8  | 1792.7 | 2744.9  |
| 28        | 175.9 | 276.3 | 644.4 | 1502.1 | 2355.7 | 28        | 349.0   | 489.3  | 959.4  | 1871.0 | 2883.9  |
| 29        | 174.3 | 278.0 | 672.9 | 1606.6 | 2514.5 | 29        | 371.6   | 520.9  | 1013.3 | 1981.9 | 3083.9  |
| 30        | 168.7 | 273.9 | 688.0 | 1692.5 | 2643.0 | 30        | 398.0   | 560.3  | 1082.9 | 2132.4 | 3358.8  |
| 31        | 159.7 | 264.3 | 688.1 | 1753.8 | 2733.6 | 31        | 428.4   | 608.2  | 1171.0 | 2330.8 | 3725.7  |
| 32        | 148.2 | 250.2 | 672.9 | 1785.2 | 2780.1 | 32        | 462.8   | 665.5  | 1280.5 | 2587.1 | 4205.1  |
| 33        | 135.0 | 232.5 | 643.3 | 1782.1 | 2778.6 | 33        | 501.0   | 733.1  | 1415.0 | 2912.5 | 4820.9  |
| 34        | 121.1 | 212.6 | 601.2 | 1741.4 | 2728.1 | 34        | 542.7   | 811.6  | 1577.7 | 3318.7 | 5597.7  |
| 35        | 107.4 | 191.9 | 549.7 | 1662.3 | 2630.7 | 35        | 587.7   | 901.2  | 1771.9 | 3816.6 | 6557.3  |
| 36        | 94.5  | 171.5 | 492.2 | 1546.7 | 2491.3 | 36        | 635.3   | 1001.8 | 1999.4 | 4412.4 | 7709.5  |
| 37        | 83.1  | 152.4 | 432.1 | 1399.3 | 2317.9 | 37        | 684.7   | 1112.1 | 2260.1 | 5102.6 | 9038.7  |
| 38        | 73.3  | 135.4 | 372.8 | 1227.6 | 2119.9 | 38        | 735.3   | 1229.7 | 2549.7 | 5866.0 | 10483.9 |
| 39        | 65.5  | 120.9 | 317.0 | 1041.4 | 1907.6 | 39        | 786.1   | 1350.7 | 2858.3 | 6654.4 | 11917.8 |
| 40        | 59.6  | 109.4 | 266.4 | 851.6  | 1691.3 | 40        | 836.3   | 1469.3 | 3167.7 | 7383.6 | 13132.3 |

| GA(weeks) | sEng  |      |      |        |        | GA(weeks) | PlGF/sVEGFR1 |       |       |        |        |
|-----------|-------|------|------|--------|--------|-----------|--------------|-------|-------|--------|--------|
|           | 2.5th | 10th | 50th | 0.90th | 97.5th |           | 2.5th        | 10th  | 50th  | 0.90th | 97.5th |
| 12        | 4.28  | 5.09 | 6.84 | 9.01   | 11.37  | 12        | 0.012        | 0.023 | 0.047 | 0.118  | 0.169  |
| 13        | 4.21  | 5.01 | 6.68 | 8.88   | 11.32  | 13        | 0.016        | 0.029 | 0.060 | 0.156  | 0.228  |
| 14        | 4.12  | 4.91 | 6.50 | 8.70   | 11.14  | 14        | 0.020        | 0.036 | 0.077 | 0.202  | 0.306  |
| 15        | 4.03  | 4.82 | 6.32 | 8.50   | 10.88  | 15        | 0.026        | 0.046 | 0.098 | 0.259  | 0.404  |
| 16        | 3.95  | 4.72 | 6.15 | 8.29   | 10.56  | 16        | 0.033        | 0.057 | 0.123 | 0.327  | 0.525  |
| 17        | 3.87  | 4.62 | 5.99 | 8.07   | 10.22  | 17        | 0.042        | 0.071 | 0.154 | 0.408  | 0.673  |
| 18        | 3.79  | 4.54 | 5.85 | 7.86   | 9.88   | 18        | 0.053        | 0.088 | 0.192 | 0.502  | 0.846  |
| 19        | 3.73  | 4.46 | 5.73 | 7.66   | 9.58   | 19        | 0.064        | 0.109 | 0.236 | 0.611  | 1.045  |
| 20        | 3.68  | 4.40 | 5.63 | 7.50   | 9.34   | 20        | 0.077        | 0.132 | 0.287 | 0.734  | 1.266  |
| 21        | 3.64  | 4.36 | 5.56 | 7.38   | 9.17   | 21        | 0.091        | 0.158 | 0.344 | 0.870  | 1.503  |
| 22        | 3.62  | 4.33 | 5.53 | 7.30   | 9.09   | 22        | 0.104        | 0.185 | 0.406 | 1.016  | 1.748  |
| 23        | 3.61  | 4.32 | 5.52 | 7.29   | 9.12   | 23        | 0.115        | 0.211 | 0.471 | 1.169  | 1.991  |
| 24        | 3.61  | 4.33 | 5.55 | 7.33   | 9.26   | 24        | 0.124        | 0.234 | 0.535 | 1.324  | 2.220  |
| 25        | 3.64  | 4.35 | 5.62 | 7.46   | 9.55   | 25        | 0.129        | 0.252 | 0.594 | 1.472  | 2.426  |
| 26        | 3.68  | 4.40 | 5.73 | 7.66   | 9.99   | 26        | 0.129        | 0.261 | 0.642 | 1.605  | 2.596  |
| 27        | 3.73  | 4.47 | 5.87 | 7.96   | 10.62  | 27        | 0.125        | 0.261 | 0.676 | 1.716  | 2.723  |
| 28        | 3.81  | 4.56 | 6.05 | 8.37   | 11.46  | 28        | 0.117        | 0.251 | 0.690 | 1.796  | 2.799  |
| 29        | 3.90  | 4.67 | 6.28 | 8.91   | 12.56  | 29        | 0.105        | 0.232 | 0.683 | 1.837  | 2.822  |
| 30        | 4.00  | 4.80 | 6.55 | 9.58   | 13.93  | 30        | 0.091        | 0.206 | 0.655 | 1.834  | 2.792  |
| 31        | 4.12  | 4.95 | 6.86 | 10.40  | 15.63  | 31        | 0.077        | 0.175 | 0.607 | 1.787  | 2.711  |
| 32        | 4.25  | 5.11 | 7.22 | 11.40  | 17.69  | 32        | 0.062        | 0.144 | 0.545 | 1.698  | 2.585  |
| 33        | 4.40  | 5.29 | 7.62 | 12.57  | 20.11  | 33        | 0.049        | 0.115 | 0.473 | 1.571  | 2.423  |
| 34        | 4.55  | 5.48 | 8.06 | 13.91  | 22.87  | 34        | 0.038        | 0.089 | 0.398 | 1.416  | 2.233  |
| 35        | 4.70  | 5.67 | 8.53 | 15.42  | 25.87  | 35        | 0.029        | 0.068 | 0.325 | 1.244  | 2.023  |
| 36        | 4.86  | 5.86 | 9.02 | 17.03  | 28.95  | 36        | 0.022        | 0.051 | 0.259 | 1.065  | 1.804  |
| 37        | 5.00  | 6.04 | 9.53 | 18.68  | 31.80  | 37        | 0.017        | 0.039 | 0.202 | 0.889  | 1.584  |
| 38        | 5.13  | 6.20 | #### | 20.23  | 34.01  | 38        | 0.013        | 0.030 | 0.155 | 0.725  | 1.368  |
| 39        | 5.23  | 6.32 | #### | 21.49  | 35.09  | 39        | 0.010        | 0.023 | 0.117 | 0.578  | 1.164  |
| 40        | 5.29  | 6.40 | #### | 22.26  | 34.55  | 40        | 0.008        | 0.019 | 0.089 | 0.452  | 0.975  |

| GA(weeks) | PIGF/sEng |      |       |        |        |
|-----------|-----------|------|-------|--------|--------|
|           | 2.5th     | 10th | 50th  | 0.90th | 97.5th |
| 12        | 2.2       | 3.6  | 6.6   | 13.9   | 20.9   |
| 13        | 2.8       | 4.6  | 8.6   | 18.4   | 28.7   |
| 14        | 3.6       | 5.9  | 11.2  | 24.2   | 38.7   |
| 15        | 4.6       | 7.5  | 14.4  | 31.4   | 51.1   |
| 16        | 5.9       | 9.4  | 18.4  | 40.3   | 66.1   |
| 17        | 7.5       | 11.8 | 23.3  | 51.2   | 84.0   |
| 18        | 9.4       | 14.6 | 29.2  | 64.3   | 104.8  |
| 19        | 11.6      | 18.0 | 36.1  | 79.5   | 128.5  |
| 20        | 14.0      | 21.7 | 44.1  | 97.0   | 155.0  |
| 21        | 16.7      | 25.8 | 52.9  | 116.6  | 184.0  |
| 22        | 19.4      | 30.0 | 62.5  | 137.9  | 214.9  |
| 23        | 21.9      | 34.1 | 72.3  | 160.4  | 247.0  |
| 24        | 23.9      | 37.8 | 82.0  | 183.5  | 279.5  |
| 25        | 25.2      | 40.7 | 91.0  | 206.1  | 311.4  |
| 26        | 25.6      | 42.5 | 98.7  | 227.3  | 341.4  |
| 27        | 25.1      | 43.0 | 104.5 | 245.9  | 368.5  |
| 28        | 23.6      | 42.0 | 107.8 | 260.8  | 391.4  |
| 29        | 21.3      | 39.8 | 108.4 | 271.1  | 409.1  |
| 30        | 18.6      | 36.4 | 106.1 | 276.0  | 420.7  |
| 31        | 15.7      | 32.3 | 101.2 | 275.2  | 425.5  |
| 32        | 12.9      | 27.9 | 94.0  | 268.7  | 423.3  |
| 33        | 10.3      | 23.5 | 85.2  | 256.8  | 414.0  |
| 34        | 8.2       | 19.4 | 75.3  | 240.2  | 398.1  |
| 35        | 6.5       | 15.8 | 65.1  | 219.9  | 376.3  |
| 36        | 5.2       | 12.9 | 55.1  | 197.2  | 349.6  |
| 37        | 4.3       | 10.5 | 45.8  | 173.1  | 319.2  |
| 38        | 3.8       | 8.7  | 37.6  | 148.9  | 286.4  |
| 39        | 3.5       | 7.4  | 30.4  | 125.6  | 252.6  |
| 40        | 3.7       | 6.6  | 24.5  | 103.9  | 219.0  |
